# Supplementary material for: Inhibitory effects on smooth muscle cell adhesion and proliferation due to oscillating electric fields by nanogenerators
Source: Royal Society of Chemistry journal article supplement (doi:10.1039/d4nr04405c), 2025-01-01
Supplement: d4nr04405c1.pdf [file d4nr04405c1.pdf]

## Supporting Information

### Inhibitory Effect to Smooth Muscle Cells Adhesion and Proliferation from Oscillating Electric Fields by Nanogenerators

Zulmari Silva Pedraza<sup>1</sup>, Fengdan Pan<sup>1</sup>, Pengfei Chen<sup>1</sup>, Steven Melendez Rosario<sup>1</sup>, Grace Wu<sup>1</sup>,  
Derui Wang<sup>1</sup> Jooyong Kim,<sup>2</sup> Qianfan Yang<sup>2</sup>, Bo Liu<sup>2,\*</sup> and Xudong Wang<sup>1,\*</sup>

1. Department of Materials Science and Engineering, University of Wisconsin–Madison, Madison, Wisconsin 53706, United States
2. Department of Cell and Regenerative Biology, University of Wisconsin-Madison, Madison, WI 53792, United States

Email: XW: [xudong.wang@wisc.edu](mailto:xudong.wang@wisc.edu), BL: [bliu24@wisc.edu](mailto:bliu24@wisc.edu)

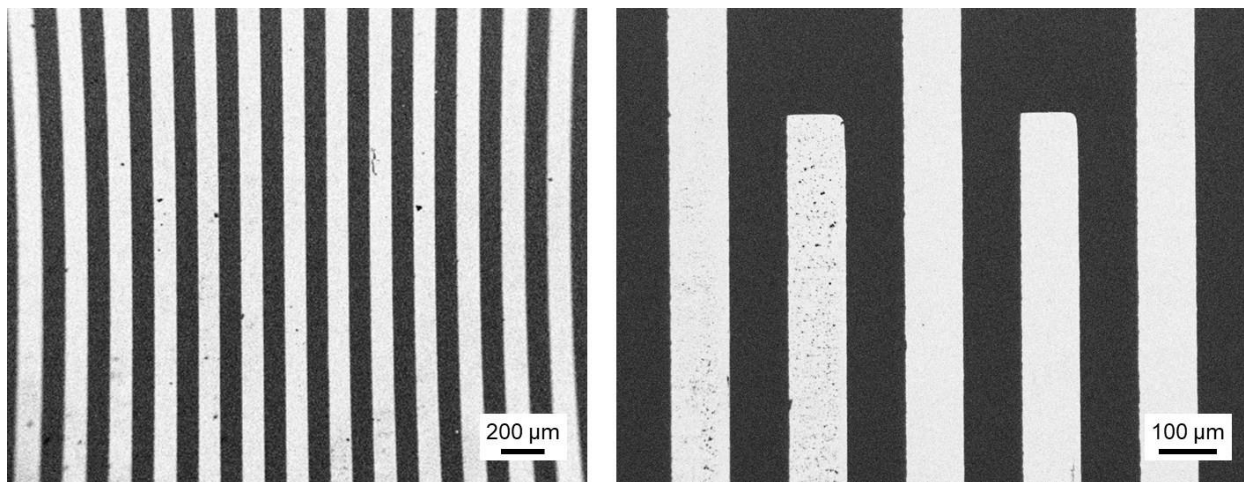

**Supplemental Figure S1. Au evaporated interdigitated electrode size and spacing.** SEM images showing the thickness (100μm) and distance (100μm) between the Au evaporated electrodes (bright contrast) on the glass substrate (dark contrast).

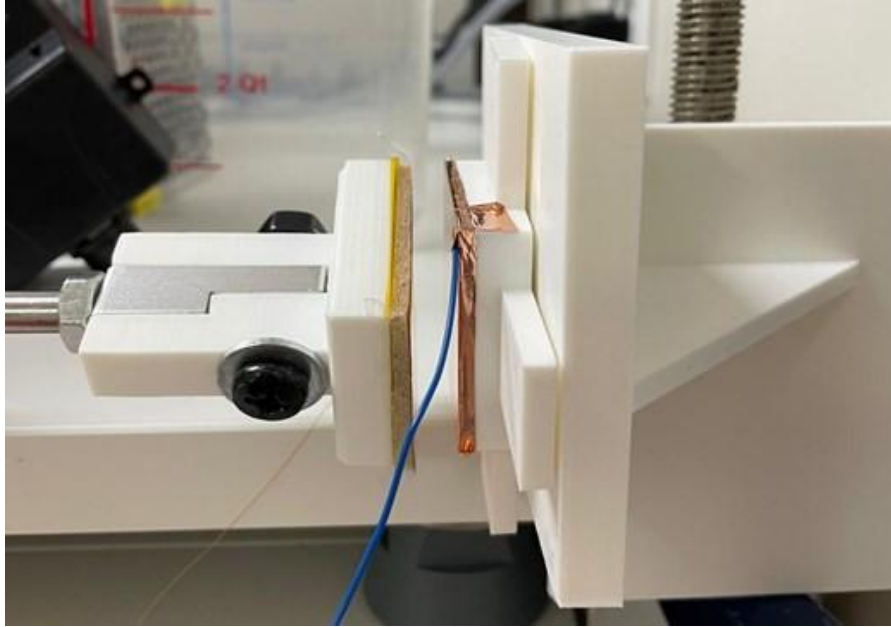

**Supplemental Figure S2. Nanogenerator oEF supply.** Image of NG setup to produce oscillating EF showing the 3D printed mounts and unrestricted movement of the NG parallel to the ground.

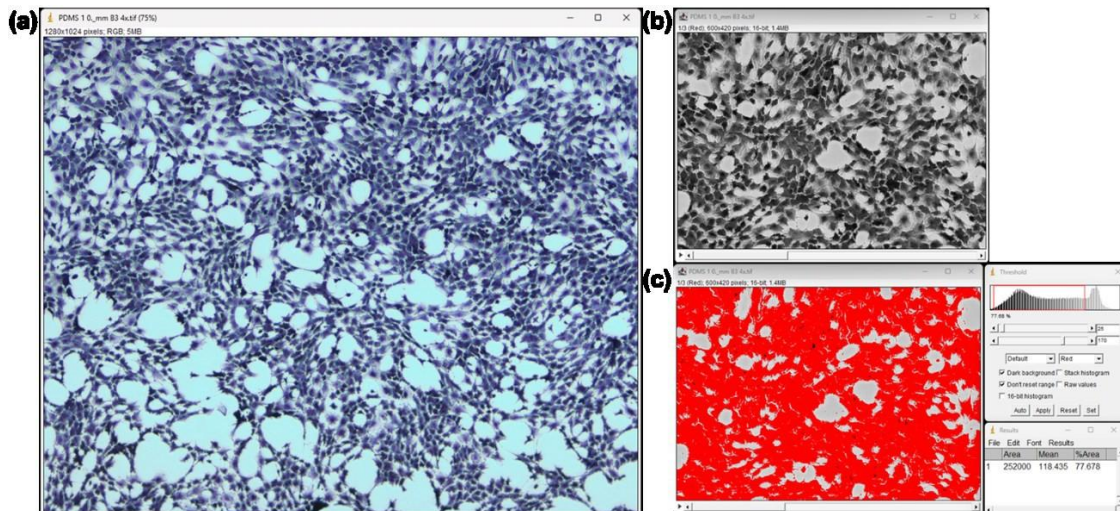

**Supplemental Figure S3. ImageJ analysis of optical images.** Example of the control group (PDMS, no EF), (a) showing the selection of a 600 x 420 area on the image. (b) The cropped image is converted to an RGB stack and transformed to a 16-bit format. (c) The threshold minimum and maximum are then adjusted manually until an individualized and accurate percentage of cell area coverage is obtained using the "measure" tool.

| Condition      | Before (pH) | After 24 hours (pH) |
|----------------|-------------|---------------------|
| Control        | 8.3         | 8.0, 8.0, 8.0       |
| Electric Field | 8.3         | 8.0, 7.9, 7.9       |

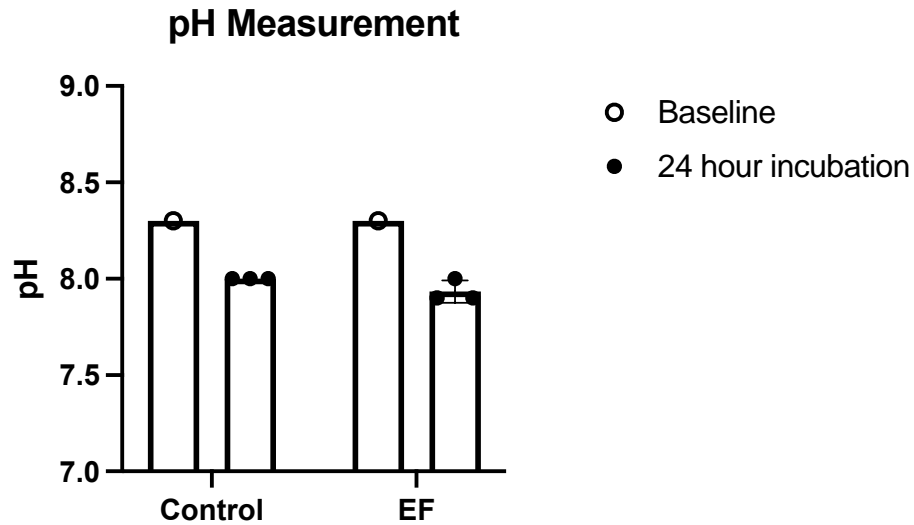

**Supplemental Figure S4. pH measurements.** Statistical significance was determined at a predefined threshold ( $p < 0.05$ ). The mean pH for the control group ( $8.00 \pm 0.00$ ) did not significantly differ from the electric field (EF) group ( $7.93 \pm 0.06$ ) after 24 hours of incubation at  $37^{\circ}\text{C}$  with 5%  $\text{CO}_2$  ( $p > 0.05$ ).

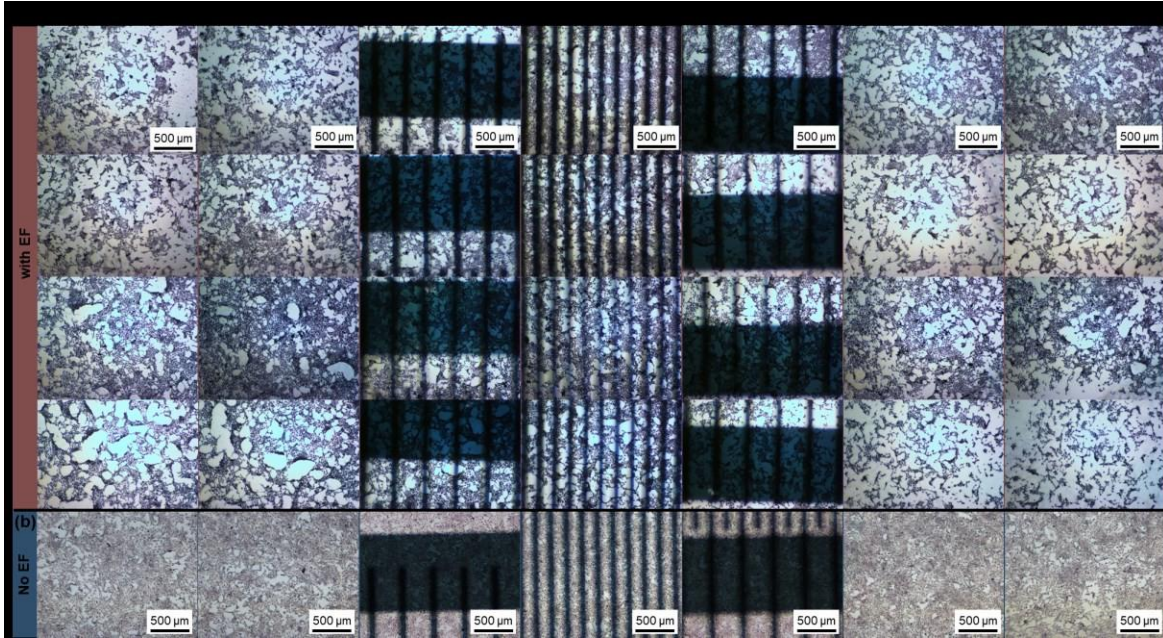

**Supplemental Figure S5. MOVAS cell distribution over fabricated substrates in response to 1V.** Microscope images showing the stained cells on the surface of the layered substrates (a) exposed to EF of a peak-to-peak voltage of 1V for 24h and (b) control slides with Au electrodes and PDMS layer but no applied EF.

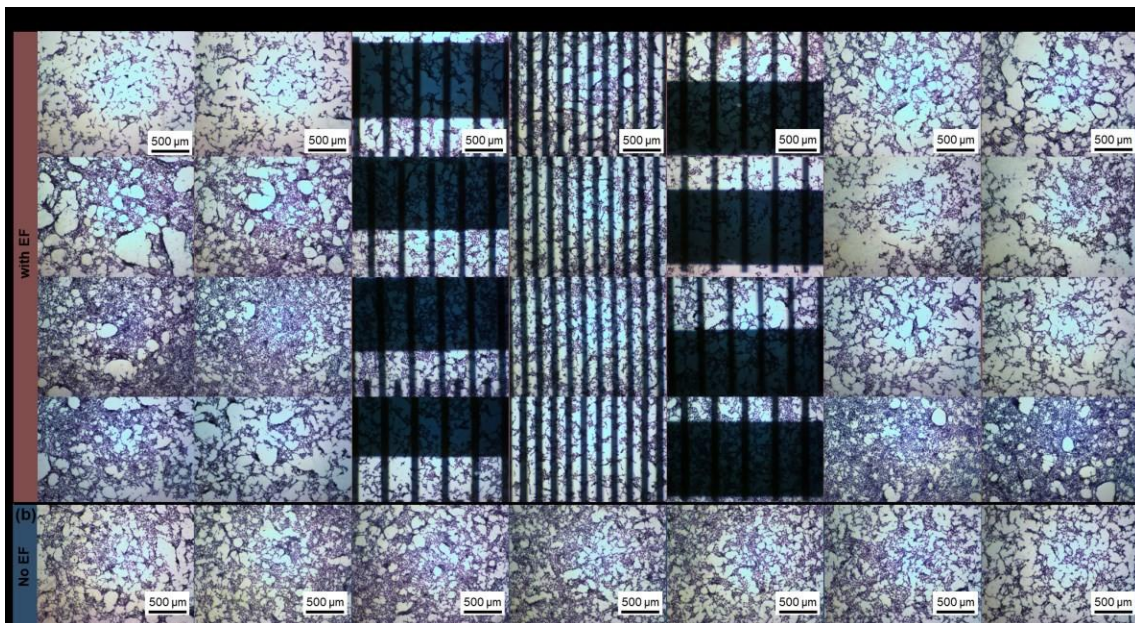

**Supplemental Figure S6. MOVAS cell distribution over fabricated substrates in response to 3V.** Microscope images showing the stained cells on the surface of the layered substrates (a) exposed to EF of a peak-to-peak voltage of 3V for 24h and (b) control slides with only PDMS layer and no applied EF.

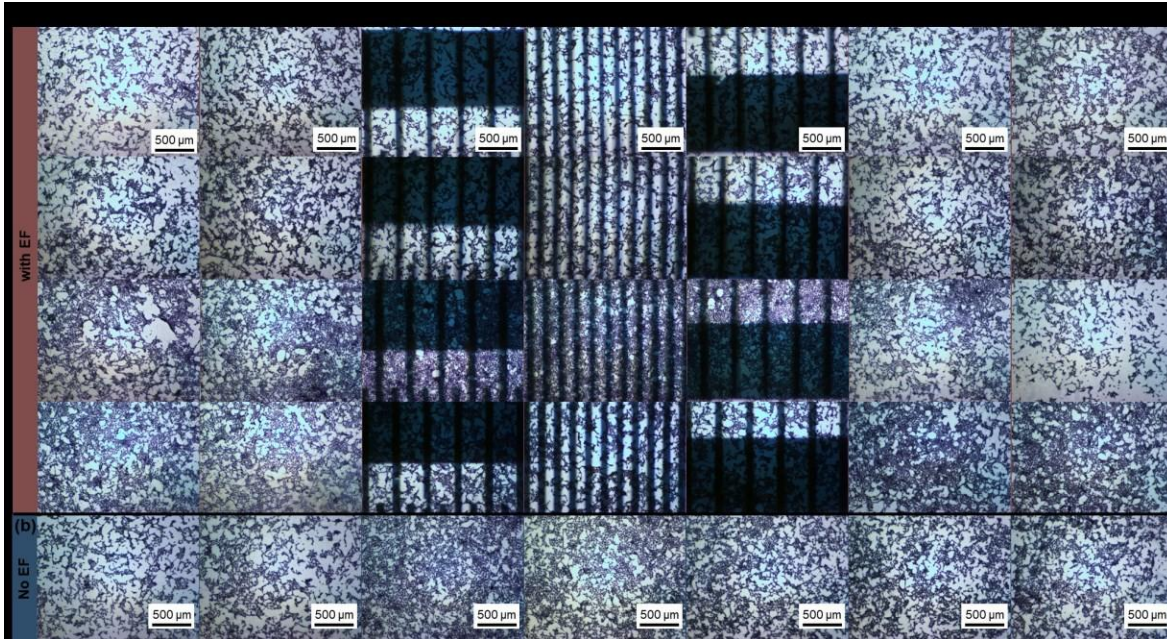

**Supplemental Figure S7. MOVAS cell distribution over fabricated substrates in response to 4V.** Microscope images showing the stained cells on the surface of the layered substrates (a) exposed to EF of a peak-to-peak voltage of 4V for 24h and (b) control slides with only PDMS layer and no applied EF.

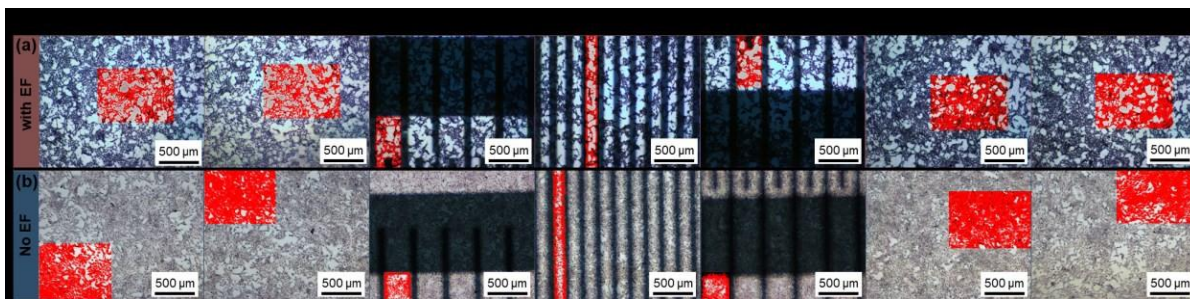

**Supplemental Figure 8.** Example of microscope image analysis through coverage/contrast correlation showing the selected areas on the surface of the layered substrates (a) exposed to oEF of a peak-to-peak voltage of 4V for 24h and (b) control slides with Au electrodes and PDMS layer but no applied EF.
